# Supplementary material
Source: PubMed Central journal article supplement (PMC2493578)

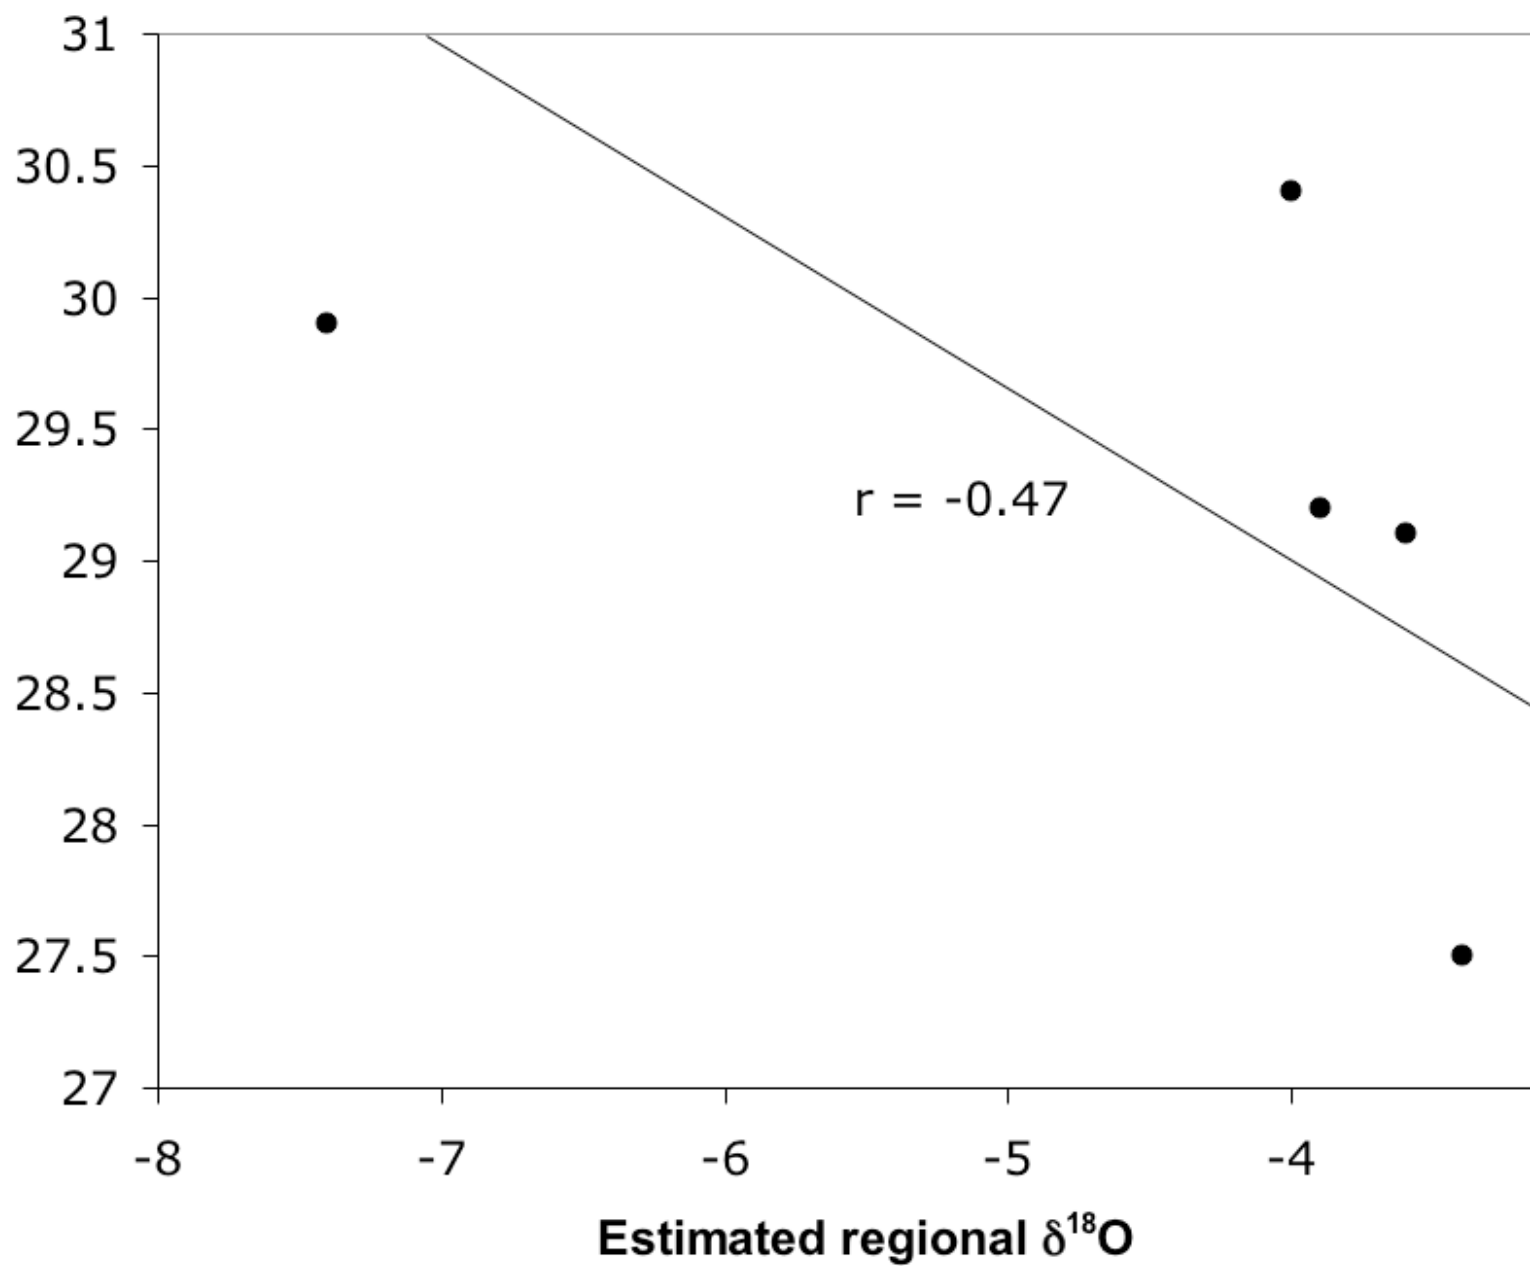

Supplement: rspb20070330s06.pdf [file rspb20070330s06.pdf]

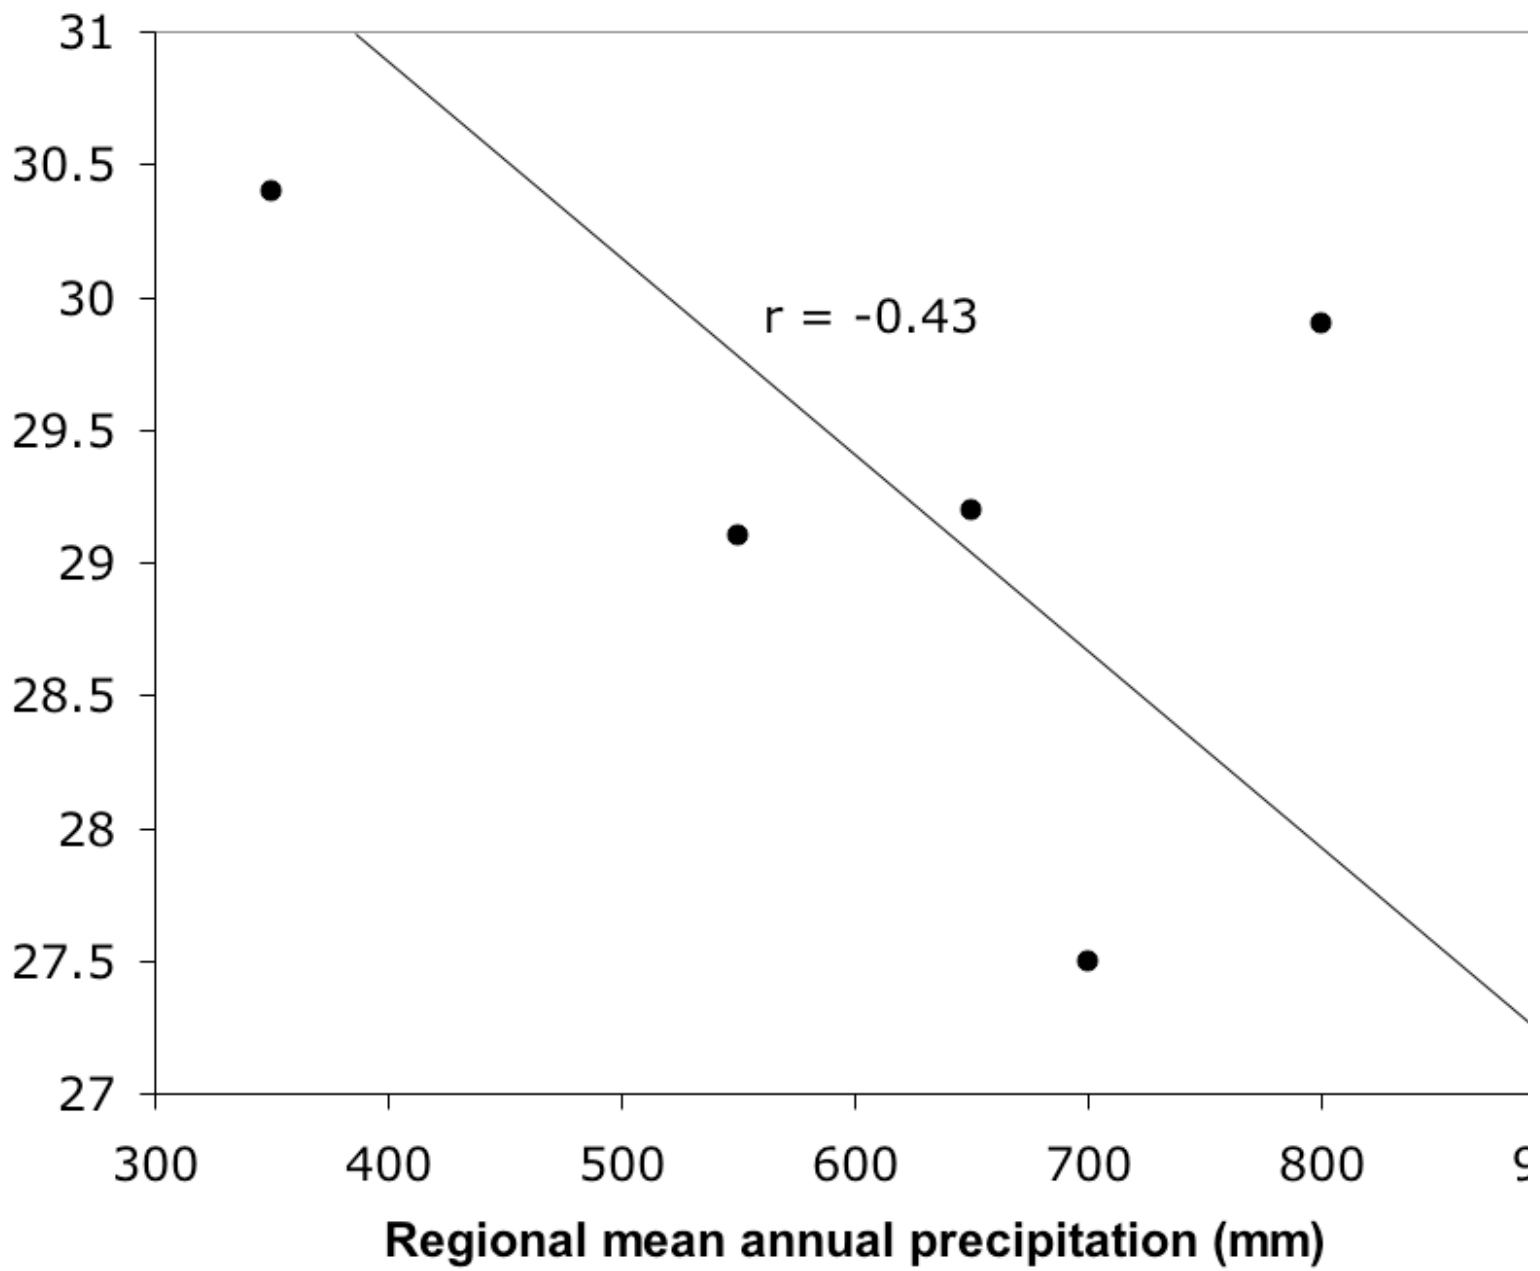

Supplement: rspb20070330s07.pdf [file rspb20070330s07.pdf]
